# Supplementary material
Source: ML conference proceedings conference paper supplement (https://proceedings.neurips.cc/paper_files/paper/2014/hash/dc5689792e08eb2e219dce49e64c885b-Abstract.html)
Supplement: Supplementary file [file dc5689792e08eb2e219dce49e64c885b-Supplemental.zip]

---

# Minimax-optimal Inference from Partial Rankings: Supplementary Material

---

We introduce some additional notations used in the proof. The first-order partial derivative of  $\mathcal{L}(\theta)$  is given by

$$\nabla_i \mathcal{L}(\theta) = \sum_{j: i \in S_j} \sum_{\ell=1}^{k_j-1} \mathbb{I}_{\{\sigma_j^{-1}(i) \geq \ell\}} \left[ \mathbb{I}_{\{\sigma_j(\ell)=i\}} - \frac{\exp(\theta_i)}{\exp(\theta_{\sigma_j(\ell)}) + \cdots + \exp(\theta_{\sigma_j(k_j)})} \right], \forall i \in [n] \quad (1)$$

and the Hessian matrix  $H(\theta) \in \mathcal{S}^n$  with  $H_{ii'}(\theta) = \frac{\partial^2 \mathcal{L}(\theta)}{\partial \theta_i \partial \theta_{i'}}$  is given by

$$H(\theta) = -\frac{1}{2} \sum_{j=1}^m \sum_{i, i' \in S_j} (e_i - e_{i'})(e_i - e_{i'})^\top \sum_{\ell=1}^{k_j-1} \frac{\exp(\theta_i + \theta_{i'}) \mathbb{I}_{\{\sigma_j^{-1}(i), \sigma_j^{-1}(i') \geq \ell\}}}{[\exp(\theta_{\sigma_j(\ell)}) + \cdots + \exp(\theta_{\sigma_j(k_j)})]^2}. \quad (2)$$

It follows from the definition that  $-H(\theta)$  is positive semi-definite for any  $\theta \in \mathbb{R}^n$ . Define  $L_j \in \mathcal{S}^n$  as

$$L_j = \frac{1}{2(k_j-1)} \sum_{i, i' \in S_j} (e_i - e_{i'})(e_i - e_{i'})^\top,$$

and then the Laplacian of the pairwise comparison graph  $G$  satisfies  $L = \sum_{j=1}^m L_j$ .

## 1 Proof of Theorem 1

We first introduce a key auxiliary result used in the proof. Let  $F$  be a fixed CDF (to be used in the Thurstone model), let  $b > 0$  and suppose  $\theta$  is a parameter to be estimated with  $\theta \in [-b, b]$  from observation  $U = (U_1, \dots, U_d)$ , where the  $U_i$ 's are independent with the common CDF given by  $F(c - \theta)$ . The following proposition gives a lower bound on the average MSE for a fixed prior distribution based on Van Trees inequality [1].

**Proposition 1.** *Let  $p_0$  be a probability density on  $[-1, 1]$  such that  $p_0(1) = p_0(-1) = 0$  and define the prior density of  $\Theta$  as  $p(\theta) = \frac{1}{b} p_0(\frac{\theta}{b})$ . Then for any estimator  $T(U)$  of  $\Theta$ ,*

$$E[(\Theta - T(U))^2] \geq \frac{1}{d} \frac{1}{I(\mu) + I(p_0)/(b^2 d)},$$

where  $\mu$  is the probability density function of  $F$  with  $I(\mu) = \int \frac{(\mu'(x))^2}{\mu(x)} dx$  and  $I(p_0) = \int_{-1}^1 \frac{(p_0'(\theta))^2}{p_0(\theta)} d\theta$ .

*Proof.* It follows from the Van Trees inequality that

$$E[(\Theta - T(U))^2] \geq \frac{1}{\int I(\theta) p(\theta) d\theta + I(p)},$$

where the Fisher information  $I(\theta) = dI(\mu)$  and

$$I(p) = \int_{-b}^b \frac{(p'(\theta))^2}{p(\theta)} d\theta = \frac{1}{b^2} \int_{-1}^1 \frac{(p_0'(\theta))^2}{p_0(\theta)} d\theta = \frac{1}{b^2} I(p_0).$$

□

*Proof of Theorem 1.* Let  $\hat{\theta}$  be a given estimator. The minimax MSE for  $\hat{\theta}$  is greater than or equal to the average MSE for a given prior distribution on  $\theta^*$ . Let  $p_0(\theta) = \cos^2(\pi\theta/2)$ , then  $I(p_0) = \pi^2$ . Define  $p(\theta) = \frac{1}{b}p_0(\frac{\theta}{b})$ . If  $n$  is even we use the following prior distribution. The prior distribution of  $\theta_i^*$  for  $i$  odd is  $p(\theta)$  and for  $i$  even,  $\theta_i^* \equiv -\theta_{i-1}^*$ . If  $n$  is odd use the same distribution for  $\theta_1^*$  through  $\theta_{n-1}^*$  and set  $\theta_n^* \equiv 0$ . Note that  $\theta^* \in \Theta_b$  with probability one. For simplicity, we assume  $n$  is odd in the rest of this proof; the modification for  $n$  even is trivial. We use the genie argument, so that the observer can see the hidden utilities in the Thurstone model. The estimation of  $\theta^*$  decouples into  $\lfloor \frac{n}{2} \rfloor$  disjoint problems, so we can focus on the estimation of  $\theta_1$  from the vector of random variables  $U = (U_1, \dots, U_{d_1})$  associated with item 1 and the vector of random variables  $V = (V_1, \dots, V_{d_2})$  associated with item 2. The distribution functions of the  $U_i$ 's are all  $F(c - \theta_1^*)$  and the distribution functions of the  $V_i$ 's are all  $F(c + \theta_1^*)$ , and the  $U$ 's and  $V$ 's are all mutually independent given  $\theta^*$ . Recall that  $\mu$  is the probability density function of  $F$ , i.e.,  $\mu = F'$ . The Fisher information for each of the  $d_1 + d_2$  observations is  $I(\mu)$ , so that Proposition 1 carries over to this situation with  $d = d_1 + d_2$ . Therefore, for any estimator  $T(U, V)$  of  $\Theta_1^*$  (the random version of  $\theta_1^*$ ),

$$E[(\Theta_1^* - T(U, V))^2] \geq \frac{1}{d_1 + d_2} \frac{1}{I(\mu) + \pi^2/(b^2(d_1 + d_2))}$$

By this reasoning, for any odd value of  $i$  with  $1 \leq i < n$  we have

$$\begin{aligned} E[(\hat{\theta}_i - \theta_i^*)^2] + E[(\hat{\theta}_{i+1} - \theta_{i+1}^*)^2] &\geq \frac{2}{I(\mu) + \pi^2/(b^2(d_1 + d_2))} \frac{1}{d_i + d_{i+1}} \\ &\geq \frac{1}{2I(\mu) + 2\pi^2/(b^2(d_1 + d_2))} \left( \frac{1}{d_{i+1}} + \frac{1}{d_{i+2}} \right). \end{aligned}$$

Summing over all odd values of  $i$  in the range  $1 \leq i < n$  yields the theorem. Furthermore, since  $\sum_{i=1}^n d_i = mk$ , by Jensen's inequality,  $\sum_{i=2}^n \frac{1}{d_i} \geq \frac{(n-1)^2}{\sum_{i=2}^n d_i} \geq \frac{(n-1)^2}{mk}$ .  $\square$

## 2 Proof of Theorem 2

The Fisher information matrix is defined as  $I(\theta) = -\mathbb{E}_\theta[H(\theta)]$  and given by

$$I(\theta) = \frac{1}{2} \sum_{j=1}^m \sum_{i, i' \in S_j} (e_i - e_{i'})(e_i - e_{i'})^\top \sum_{l=1}^{k_j-1} \mathbb{P}_\theta[\sigma_j^{-1}(i), \sigma_j^{-1}(i') \geq \ell] \frac{e^{\theta_i + \theta_{i'}}}{[e^{\theta_{\sigma_j(\ell)}} + \dots + e^{\theta_{\sigma_j(k_j)}}]^2}.$$

Since  $-H(\theta)$  is positive semi-definite, it follows that  $I(\theta)$  is positive semi-definite. Moreover,  $\lambda_1(I(\theta))$  is zero and the corresponding eigenvector is the normalized all-one vector. Fix any unbiased estimator  $\hat{\theta}$  of  $\theta \in \Theta_b$ . Since  $\hat{\theta} \in \mathcal{U}$ ,  $\hat{\theta} - \theta$  is orthogonal to  $\mathbf{1}$ . The Cramér-Rao lower bound then implies that  $\mathbb{E}[\|\hat{\theta} - \theta\|^2] \geq \sum_{i=2}^n \frac{1}{\lambda_i(I(\theta))}$ . Taking the supremum over both sides gives

$$\sup_{\theta} \mathbb{E}[\|\hat{\theta} - \theta\|^2] \geq \sup_{\theta} \sum_{i=2}^n \frac{1}{\lambda_i(I(\theta))} \geq \sum_{i=2}^n \frac{1}{\lambda_i(I(0))}.$$

If  $\theta$  equals the all-zero vector, then

$$\mathbb{P}[\sigma_j^{-1}(i), \sigma_j^{-1}(i') \geq \ell] = \frac{(k_j - 2)(k_j - 3) \cdots (k_j - \ell)}{k_j(k_j - 1) \cdots (k_j - \ell + 2)} = \frac{(k_j - \ell + 1)(k_j - \ell)}{k_j(k_j - 1)}.$$

It follows from the definition that

$$I(0) = \frac{1}{2} \sum_{j=1}^m \sum_{i, i' \in S_j} (e_i - e_{i'})(e_i - e_{i'})^\top \sum_{l=1}^{k_j-1} \frac{k_j - \ell}{k_j(k_j - 1)(k_j - \ell + 1)} \leq \left(1 - \frac{1}{k_{\max}} \sum_{\ell=1}^{k_{\max}} \frac{1}{\ell}\right) L.$$

By Jensen's inequality,

$$\sum_{i=2}^n \frac{1}{\lambda_i} \geq \frac{(n-1)^2}{\sum_{i=2}^n \lambda_i} = \frac{(n-1)^2}{\text{Tr}(L)} = \frac{(n-1)^2}{\sum_{i=1}^n d_i} = \frac{(n-1)^2}{mk}.$$

### 3 Proof of Lemma 1

The idea of the proof is to view  $\nabla \mathcal{L}(\theta^*)$  as the final value of a discrete time vector-valued martingale with values in  $\mathbb{R}^n$ . Consider a user that ranks items  $1, \dots, k$ . The PL model for the ranking can be generated in a series of  $k - 1$  rounds. In the first round, the top rated item for the user is found. Suppose it is item  $I$ . This contributes the term  $e_I - (p_1, p_2, \dots, p_k, 0, 0, \dots, 0)$  to  $\nabla \mathcal{L}(\theta^*)$ , where  $p_i = P\{I = i\}$ . This contribution is a mean zero random vector in  $\mathbb{R}^n$  and its norm is less than one. For notational convenience, suppose  $I = k$ . In the second round, item  $k$  is removed from the competition, and an item  $J$  is to be selected at random from among  $\{1, \dots, k - 1\}$ . If  $q_j$  denotes  $P\{J = j\}$  for  $1 \leq j \leq k - 1$ , then the contribution of the second round for the user to  $\nabla \mathcal{L}(\theta^*)$  is the random vector  $e_J - (q_1, q_2, \dots, q_{k-1}, 0, 0, \dots, 0)$ , which has conditional mean zero (given  $I$ ) and norm less than or equal to one. Considering all  $m$  users and  $k_j - 1$  rounds for user  $j$ , we see that  $\nabla \mathcal{L}(\theta^*)$  is the value of a discrete-time martingale at time  $m(k - 1)$  such that the martingale has initial value zero and increments with norm bounded by one. By the vector version of the Azuma-Hoeffding inequality found in [2, Theorem 1.8] we have

$$\mathbb{P}\{\|\nabla \mathcal{L}(\theta^*)\| \geq \delta\} \leq 2e^2 e^{-\frac{\delta^2}{2m(k-1)}},$$

which implies the result.

### 4 Proof of Lemma 2

We first introduce a key auxiliary result used in the proof.

**Claim 1.** *Given  $\theta \in \mathbb{R}^r$ , let  $A = \text{diag}(p) - pp^T$ , where  $p$  is the column probability vector with  $p_i = e^{\theta_i} / (e^{\theta_1} + \dots + e^{\theta_r})$  for each  $i$ . If  $|\theta_i| \leq b$ , for  $1 \leq i \leq r$ , then  $\lambda_2(A) \geq \frac{1}{re^{2b}}$ . Equivalently,  $e^{2b}A \geq B$  where  $B = \frac{1}{r}\text{diag}(\mathbf{1}) - \frac{1}{r^2}\mathbf{1}\mathbf{1}^T$ .*

*Proof.* Fix  $\theta$  satisfying the conditions of the lemma. It is easy to see that for each  $i$ ,  $p_i \geq \frac{1}{re^{2b}}$ . The matrix  $A$  is positive semidefinite, and its smallest eigenvalue is zero, with the corresponding eigenvector  $\mathbf{1}$ . So  $\lambda_2(A) = \min_{\alpha} \alpha^T A \alpha$  subject to the constraints  $\alpha^T \mathbf{1} = 0$  and  $\|\alpha\|^2 = 1$ . For  $\alpha$  satisfying the constraints,

$$\begin{aligned} \alpha^T A \alpha &= \sum_i \alpha_i^2 p_i - \left( \sum_j \alpha_j p_j \right)^2 = \sum_i \left( \alpha_i - \sum_j \alpha_j p_j \right)^2 p_i \\ &= \min_c \sum_{i=1}^r (\alpha_i - c)^2 p_i \geq \min_c \sum_{i=1}^r (\alpha_i - c)^2 \frac{1}{re^{2b}} \\ &= \sum_{i=1}^r \alpha_i^2 \frac{1}{re^{2b}} = \frac{1}{re^{2b}} \end{aligned}$$

The proof of the first part of the lemma is complete. We remark that the bound of the lemma is nearly tight for the case  $\theta_1 = \dots = \theta_{r-1} = b$  and  $\theta_r = -b$ , for which  $\lambda_2(A) = \frac{e^{2b}r}{((r-1)e^{2b}+1)^2}$ . The final equivalence mentioned in the lemma follows from the facts  $\lambda_1(e^{2b}A) = \lambda_1(B) = 0$  with common corresponding eigenvector  $\mathbf{1}$ , and  $\lambda_i(e^{2b}A) \geq \frac{1}{r} = \lambda_i(B)$  for  $2 \leq i \leq r$ .  $\square$

*Proof of Lemma 2.* **Case  $k_j = 2, \forall j \in [m]$ :** The Hessian matrix simplifies as

$$H(\theta) = -\frac{1}{2} \sum_{j=1}^m \sum_{i, i' \in S_j} (e_i - e_{i'})(e_i - e_{i'})^\top \frac{\exp(\theta_i)}{\exp(\theta_i) + \exp(\theta_{i'})} \frac{\exp(\theta_{i'})}{\exp(\theta_i) + \exp(\theta_{i'})}.$$

Observe that  $H(\theta)$  is deterministic given  $S_j^m$ . Since  $|\theta_i| \leq b, \forall i \in [n]$ ,

$$\frac{\exp(\theta_i) \exp(\theta_{i'})}{[\exp(\theta_i) + \exp(\theta_{i'})]^2} \geq \frac{e^{2b}}{(1 + e^{2b})^2}.$$

It follows that  $-H(\theta) \geq \frac{e^{2b}}{(1+e^{2b})^2} L$  and the theorem follows.

**Case  $k_j > 2$  for some  $j \in [m]$ :** The Hessian matrix  $H(\theta)$  depends on  $\sigma_1^m$  and therefore is random given  $S_1^m$ . For a given user  $j$ , and  $\ell$  with  $1 \leq \ell \leq k_j - 1$ , let  $S^{(j,\ell)}$  denote the set of items contending for the  $\ell^{th}$  position in the ranking of user  $j$  after higher ranking items have been selected:  $S^{(j,\ell)} = \{i : \sigma_j^{-1}(i) \geq \ell\}$ , let  $\mathbf{1}^{(j,\ell)}$  denote the indicator vector for the set  $S^{(j,\ell)}$ , and let  $p^{(j,\ell)}$  denote the corresponding probability column vector for the selection:

$$p_i^{(j,\ell)} = P(\sigma_j(\ell) = i | \sigma_j(1), \dots, \sigma_j(\ell-1)) = \frac{\mathbf{1}_i^{(j,\ell)} e^{\theta_i}}{\sum_{i' \in S_{j,\ell}} e^{\theta_{i'}}}$$

The Hessian can be written as  $H(\theta) = \sum_{j=1}^m \sum_{\ell=1}^{k_j-1} H^{(j,\ell)}$  where

$$-H^{(j,\ell)} = \frac{1}{2} \sum_{i,i' \in S^{(j,\ell)}} (e_i - e_{i'})(e_i - e_{i'})^\top p_i^{(j,\ell)} p_{i'}^{(j,\ell)} = \text{diag}(p^{(j,\ell)}) - p^{(j,\ell)}(p^{(j,\ell)})^\top$$

By Claim 1 applied to the restriction of  $-H^{(j,\ell)}$  to  $S^{(j,\ell)} \times S^{(j,\ell)}$ ,

$$\begin{aligned} -e^{2b} H^{(j,\ell)} &\geq \frac{1}{k_j - \ell + 1} \text{diag}(\mathbf{1}^{(j,\ell)}) - \frac{1}{(k_j - \ell + 1)^2} \mathbf{1}^{(j,\ell)} (\mathbf{1}^{(j,\ell)})^\top \\ &= \frac{1}{2(k_j - \ell + 1)^2} \sum_{i,i' \in S^{(j,\ell)}} (e_i - e_{i'})(e_i - e_{i'})^\top \end{aligned} \quad (3)$$

Summing over  $j$  and  $\ell$  in (3) and noting that  $k_j - \ell + 1 \leq k_j$  for all  $j, \ell$  yields

$$-e^{2b} H(\theta) \geq \frac{1}{2} \sum_{j=1}^m \sum_{i,i' \in S_j} (e_i - e_{i'})(e_i - e_{i'})^\top \frac{1}{k_j^2} \sum_{\ell=1}^{k_j-1} \mathbb{I}_{\{\sigma_j^{-1}(i), \sigma_j^{-1}(i') \geq \ell\}} := \tilde{L} \quad (4)$$

Observe that

$$\sum_{\ell=1}^{k_j-1} \mathbb{P}_\theta [\sigma_j^{-1}(i), \sigma_j^{-1}(i') \geq \ell] = 1 + \sum_{i'' \in S_j} \mathbb{I}_{\{i'' \neq i, i'\}} \frac{e^{\theta_{i''}}}{e^{\theta_i} + e^{\theta_{i'}} + e^{\theta_{i''}}} \geq 1 + \frac{k_j - 2}{2e^{2b} + 1} \geq \frac{k_j + 1}{3e^{2b}}.$$

Recall that  $L$  is the Laplacian of  $G$  and  $L = \sum_{j=1}^m L_j$ . It follows that

$$\begin{aligned} \mathbb{E}_\theta[\tilde{L}] &= \frac{1}{2} \sum_{j=1}^m \sum_{i,i' \in S_j} (e_i - e_{i'})(e_i - e_{i'})^\top \frac{1}{k_j^2} \sum_{\ell=1}^{k_j-1} \mathbb{P}_\theta[\sigma_j^{-1}(i), \sigma_j^{-1}(i') \geq \ell] \\ &\geq \frac{1}{2} \sum_{j=1}^m \sum_{i,i' \in S_j} (e_i - e_{i'})(e_i - e_{i'})^\top \frac{k_j + 1}{3e^{2b} k_j^2} \\ &\geq \frac{1}{2} \sum_{j=1}^m \sum_{i,i' \in S_j} (e_i - e_{i'})(e_i - e_{i'})^\top \frac{1}{4e^{2b}(k_j - 1)} = \frac{1}{4e^{2b}} L \end{aligned} \quad (5)$$

Define  $a_{ii'} = \frac{1}{k_j^2} \sum_{\ell=1}^{k_j-1} (\mathbb{I}_{\{\sigma_j^{-1}(i), \sigma_j^{-1}(i') \geq \ell\}} - \mathbb{P}_\theta[\sigma_j^{-1}(i), \sigma_j^{-1}(i') \geq \ell])$ . Then

$$\tilde{L} - \mathbb{E}_\theta[\tilde{L}] = \frac{1}{2} \sum_{j=1}^m \left( \sum_{i,i' \in S_j} a_{ii'} (e_i - e_{i'})(e_i - e_{i'})^\top \right) := \sum_{j=1}^m Y_j.$$

Observe that  $|a_{ii'}| \leq \frac{1}{k_j}$  and therefore  $-\frac{(k_j-1)}{k_j} L_j \leq Y_j \leq \frac{(k_j-1)}{k_j} L_j$ . Furthermore,  $\|L_j\| = \frac{k_j}{k_j-1}$  and thus  $\|Y_j\| \leq 1$ . Moreover,  $Y_j^2 = \sum_{i,i',i'' \in S_j} a_{ii'} a_{ii''} (e_i - e_{i'})(e_i - e_{i''})^\top$ . It follows that for any vector  $x \in \mathbb{R}^n$ ,

$$\begin{aligned} x^\top Y_j^2 x &= \sum_{i,i',i'' \in S_j} a_{ii'} a_{ii''} (x_i - x_{i'})(x_i - x_{i''}) \leq \frac{1}{k_j^2} \sum_{i,i',i'' \in S_j} |x_i - x_{i'}| |x_i - x_{i''}| \\ &= \frac{1}{k_j^2} \sum_{i \in S_j} \left( \sum_{i' \in S_j} |x_i - x_{i'}| \right)^2 \leq \frac{1}{k_j} \sum_{i,i' \in S_j} (x_i - x_{i'})^2 = 2x^\top L_j x, \end{aligned}$$

where the last inequality follows from the Cauchy-Swartz inequality. Therefore,  $Y_j^2 \leq 2L_j$ . It follows that  $\sum_{j=1}^m \mathbb{E}_\theta[Y_j^2] \leq 2L$  and thus  $\|\sum_{j=1}^m \mathbb{E}_\theta[Y_j^2]\| \leq 2\lambda_n$ . By the matrix Bernstein inequality [3], with probability at least  $1 - n^{-1}$ ,

$$\|\tilde{L} - \mathbb{E}_\theta[\tilde{L}]\| \leq 2\sqrt{\lambda_n \log n} + \frac{2}{3} \log n.$$

By the assumption that  $\lambda_n \geq C \log n$  for some sufficiently large constant  $C$ ,  $\|\tilde{L} - \mathbb{E}_\theta[\tilde{L}]\| \leq 4\sqrt{\lambda_n \log n}$ . It follows from (4) and (5) that

$$\lambda_2(-H(\theta)) \geq \frac{1}{e^{2b}} \lambda_2(\tilde{L}) \geq \frac{1}{e^{2b}} \left( \frac{1}{4e^{2b}} \lambda_2 - 4\sqrt{\lambda_n \log n} \right).$$

□

## 5 Proof of Corollary 1

Recall that  $L = \sum_{j=1}^m L_j$ . Observe that  $\mathbb{E}[L_j] = \frac{k_j}{n-1} \left( I - \frac{1}{n} \mathbf{1}\mathbf{1}^\top \right)$ . Define  $Z_j = L_j - \mathbb{E}[L_j]$ . Then  $Z_1, \dots, Z_m$  are independent symmetric random matrices with zero mean. Note that

$$\|Z_j\| \leq \|L_j\| + \|\mathbb{E}[L_j]\| \leq \frac{k_j}{k_j - 1} + \frac{k_j}{n - 1} \leq 4.$$

Moreover,

$$\mathbb{E}[Z_j^2] = \frac{k_j^2}{(k_j - 1)(n - 1)} \left( I - \frac{1}{n} \mathbf{1}\mathbf{1}^\top \right) - \frac{k_j^2}{(n - 1)^2} \left( I - \frac{1}{n} \mathbf{1}\mathbf{1}^\top \right).$$

Therefore,  $\|\sum_{j=1}^m \mathbb{E}[Z_j^2]\| \leq \frac{2mk}{n-1}$ . By the matrix Bernstein inequality [3], with probability at least  $1 - n^{-1}$ ,

$$\|L - \mathbb{E}[L]\| \leq 2\sqrt{\frac{mk \log n}{n - 1}} + \frac{8}{3} \log n \leq 4\sqrt{\frac{mk \log n}{n - 1}} \leq \frac{mk}{2(n - 1)}.$$

where the last two inequalities follow from the assumption that  $mk \geq C \log n$  for some sufficiently large constant  $C$ . Since  $\mathbb{E}[L] = \frac{mk}{n-1} \left( I - \frac{1}{n} \mathbf{1}\mathbf{1}^\top \right)$ , the smallest eigenvalue of  $\mathbb{E}[L]$  is zero and all the other eigenvalues equal  $\frac{mk}{n-1}$ . It follows that

$$|\lambda_i - \frac{mk}{n-1}| \leq \|L - \mathbb{E}[L]\| \leq \frac{mk}{2(n-1)}, \quad 2 \leq i \leq n,$$

and thus  $\lambda_2 \geq \frac{mk}{2(n-1)}$  and  $\lambda_n \leq \frac{3mk}{2(n-1)}$ . By the assumption that  $mk \geq Ce^{2b} \log n$  for some sufficiently large constant  $C$ ,  $\lambda_2 - 16e^{2b} \sqrt{\lambda_n \log n} \geq \frac{mk}{4n}$ . Then the corollary follow from Theorem 3.

## 6 Proof of Corollary 2

Without loss of generality, assume  $k_j$  is even for all  $j \in [m]$ . After the random  $\mathbf{IB}$ , there are  $mk/2$  independent pairwise comparisons and let  $L$  denote the Laplacian of the comparison graph after the breaking. Recall that  $L = \sum_{j=1}^m L_j$ . With random  $\mathbf{IB}$ , we have  $\mathbb{E}[L_j] = \frac{k_j}{n-1} \left( I - \frac{1}{n} \mathbf{1}\mathbf{1}^\top \right)$ . Define  $Z_j = L_j - \mathbb{E}[L_j]$ . Then  $Z_1, \dots, Z_m$  are independent symmetric random matrices with zero mean. Moreover,

$$\|Z_j\| \leq \|L_j\| + \|\mathbb{E}[L_j]\| \leq 2 + \frac{k_j}{n-1} \leq 4,$$

and

$$\mathbb{E}[Z_j^2] = \frac{2k_j}{n-1} \left( I - \frac{1}{n} \mathbf{1}\mathbf{1}^\top \right) - \frac{k_j^2}{(n-1)^2} \left( I - \frac{1}{n} \mathbf{1}\mathbf{1}^\top \right).$$

Therefore,  $\|\sum_{j=1}^m \mathbb{E}[Z_j^2]\| \leq \frac{2mk}{n-1}$ . Following the same argument for proving Corollary 1, we can show that  $\lambda_2(L_{\mathbf{IB}}) \geq \frac{mk}{2(n-1)}$  and the corollary follows by Theorem 3 with  $k = 2$ .

## References

- [1] R. D. Gill and B. Y. Levit, “Applications of the van Trees inequality: a Bayesian Cramér-Rao bound,” *Bernoulli*, vol. 1, no. 1-2, pp. 59–79, 03 1995.
- [2] T. P. Hayes, “A large-deviation inequality for vector-valued martingales,” Available at <http://www.cs.unm.edu/~hayes/papers/VectorAzuma/VectorAzuma20050726.pdf>, 2005.
- [3] J. Tropp, “User-friendly tail bounds for sums of random matrices,” *Foundations of Computational Mathematics*, vol. 12, no. 4, pp. 389–434, 2012.
